# Supplementary material for: Sexually Transmitted Infections among Heterosexual Male Clients of Female Sex Workers in China: A Systematic Review and Meta-Analysis
Source: PLOS journal article supplement (doi:10.1371/journal.pone.0071394), 2013-08-12

**Figure S1. Prevalence of HIV in male clients of female sex workers in China.**  
Forest plot showing unadjusted estimates (squares) with 95% confidence intervals (bars). Pooled prevalence estimate is represented as red diamond in this plot.

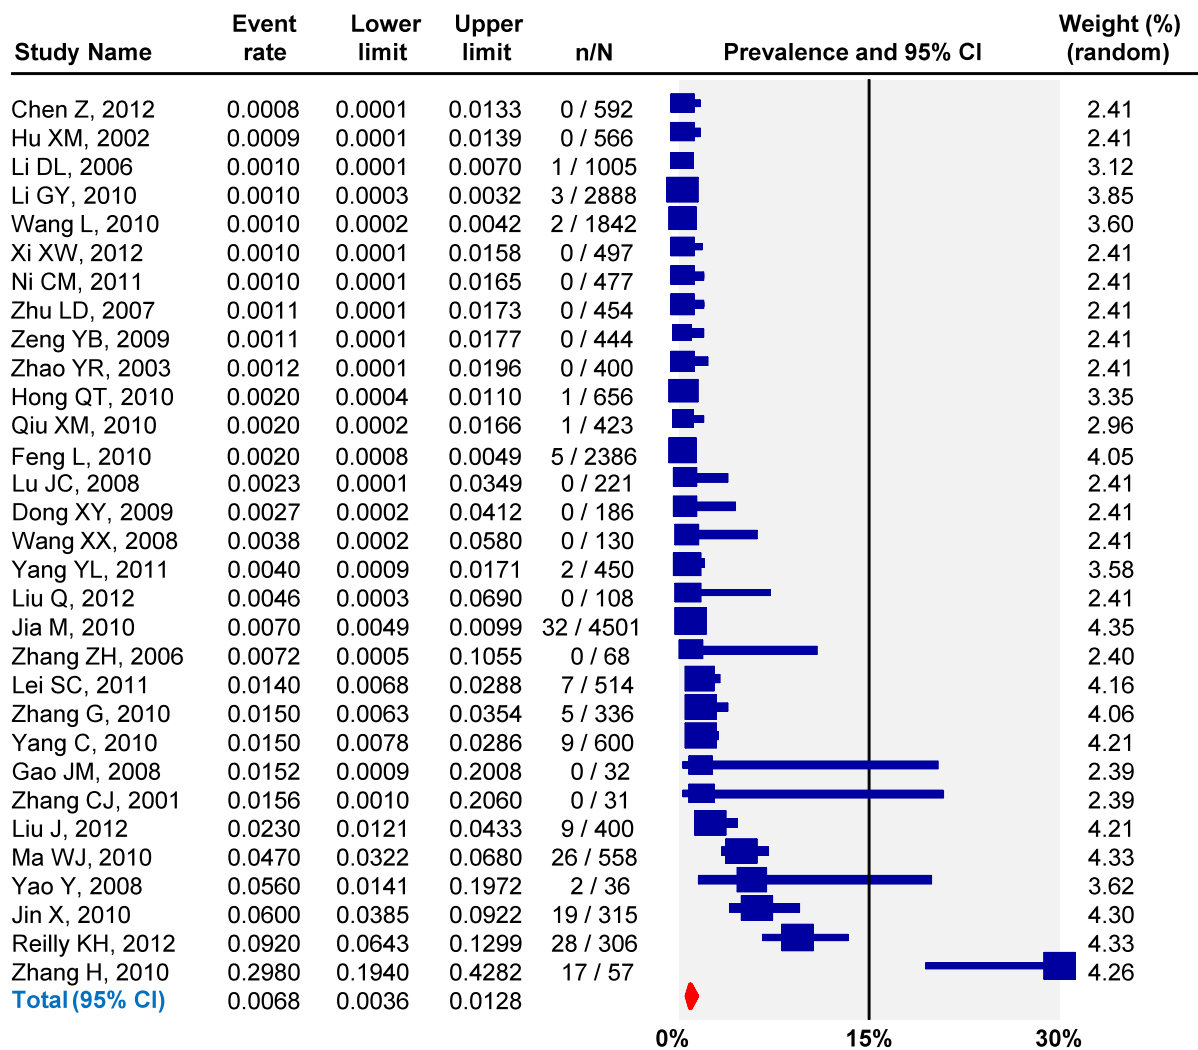

**Figure S2. Prevalence of syphilis in male clients of female sex workers in China.** Forest plot showing unadjusted estimates (squares) with 95% confidence intervals (bars). Pooled prevalence estimate is represented as red diamond in this plot.

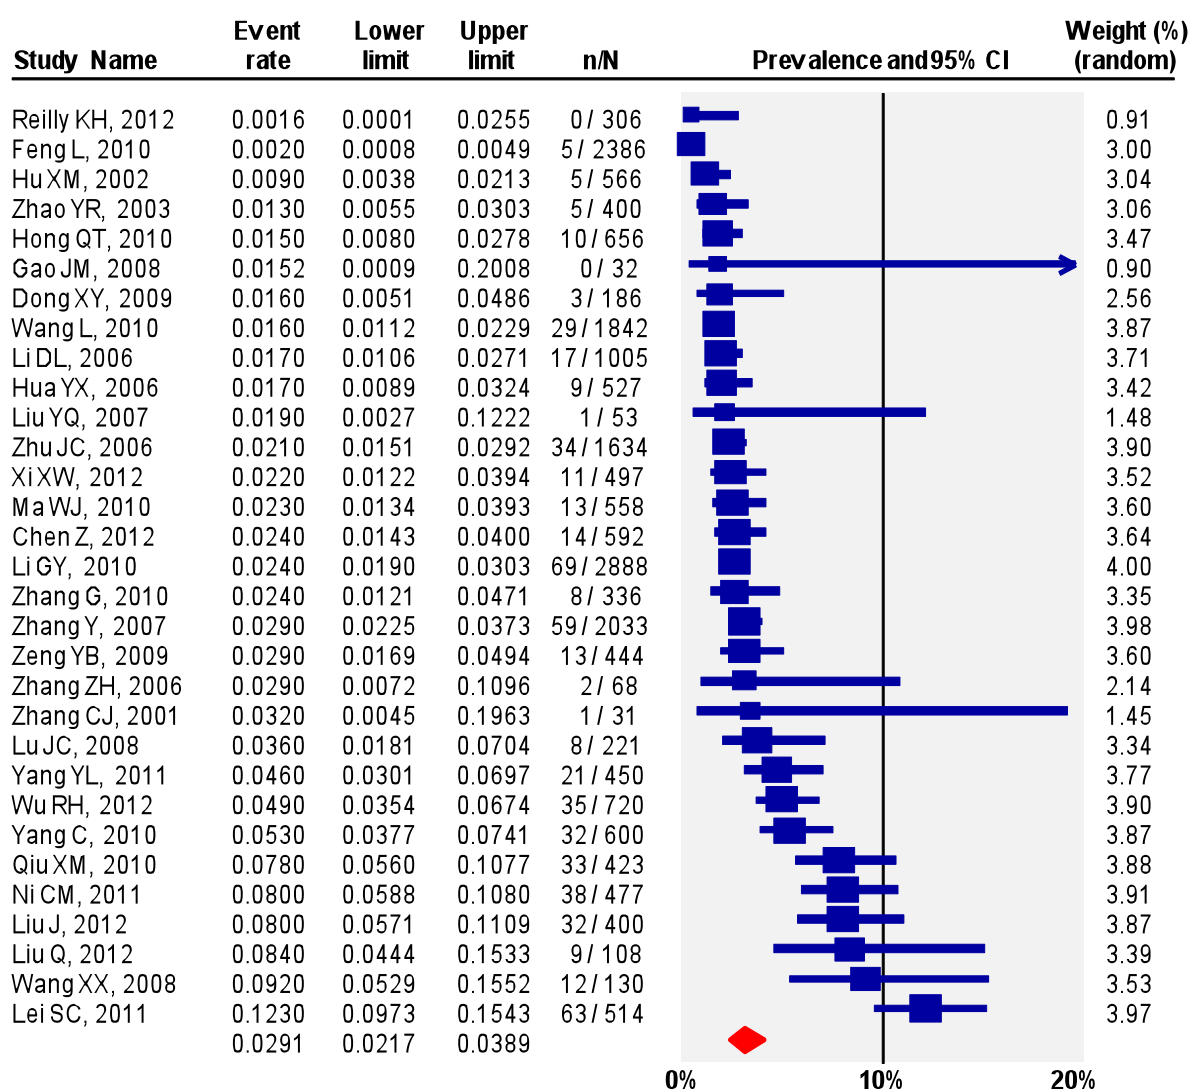

**Figure S3. Prevalence of gonorrhea in male clients of female sex workers in China.** Forest plot showing unadjusted estimates (squares) with 95% confidence intervals (bars). Pooled prevalence estimate is represented as red diamond in this plot.

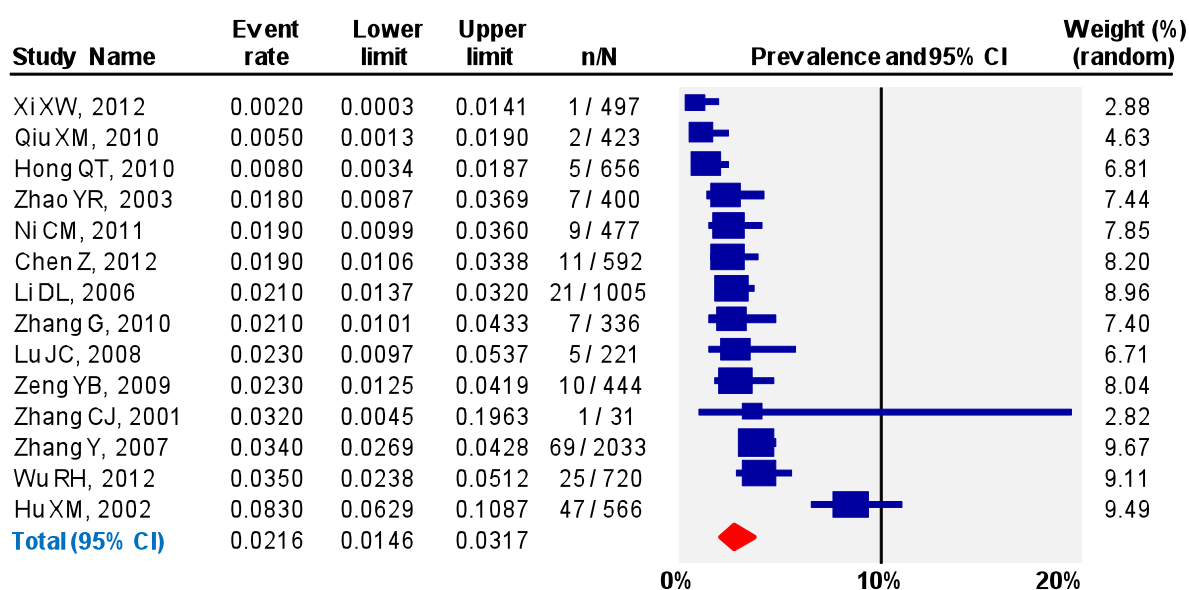

**Figure S4. Prevalence of chlamydia in male clients of female sex workers in China.** Forest plot showing unadjusted estimates (squares) with 95% confidence intervals (bars). Pooled prevalence estimate is represented as red diamond in this plot.

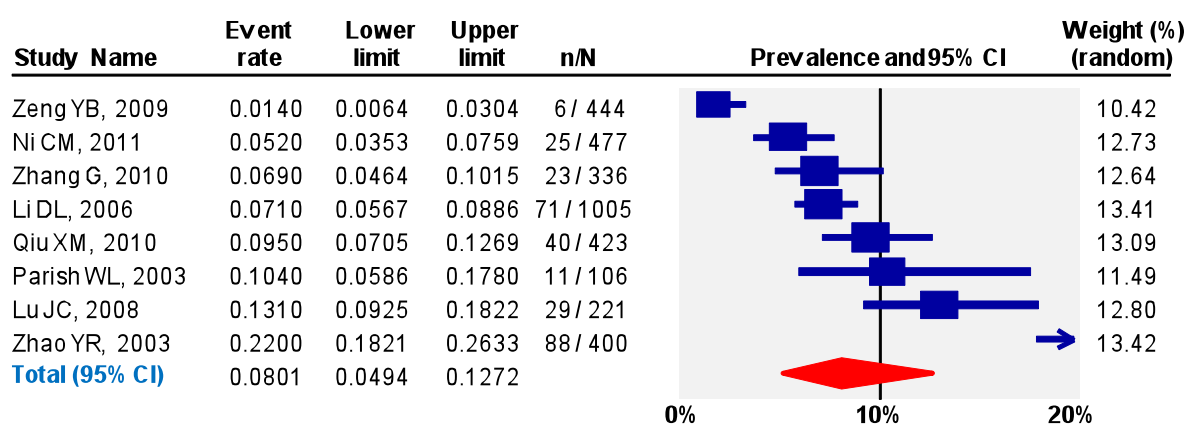

Supplement: S3 (10.1371/journal.pone.0071394.s003) [file journal.pone.0071394.s003]
